# Supplementary material
Source: PubMed Central journal article supplement (PMC3406136)
Supplement: AEM.07869-11_zam999103556so1.pdf [file AEM.07869-11_zam999103556so1.pdf]

**Supplementary Table 1. Primers used for the amplification of genes/traits of interest**

| Gene/Trait                                  | Amplicon Size (bp) | Primer Seq. (5'-3')                                                | Reference/Comments                      |
|---------------------------------------------|--------------------|--------------------------------------------------------------------|-----------------------------------------|
| <b><u>Plasmid PAI-Encoded Traits:</u></b>   |                    |                                                                    |                                         |
| <i>cvaA</i>                                 | 319                | F ATCCGGGCGTTGTCTGACGGGAAAGTTG<br>R ACCAGGGAACAGAGGCACCCGGCGTATT   | Col V operon                            |
| <i>cvaB3'</i>                               | 550                | F GGCCCGTGCCGCTCCTATTTTA<br>R TCCCGCACCGGAAGCACCAGTTAT             | Col V operon                            |
| <i>cvaB5</i>                                | 247                | F TGGCCACCCGGGCTCTTTCCTACTGGAGTT<br>R ATGCGGGTCTGCAGGGTTTCCGACTGGA | Col V operon                            |
| <i>cvaC*</i>                                | 679                | F CACACACAAACGGGAGCTGTT<br>R CTTCCCGCAGCATAGTTCCAT                 | (3)                                     |
| <i>iroN†</i>                                | 667                | F AAGTCAAAGCAGGGGTTGCCCG<br>R GACGCCGACATTAAGACGCAG                | (8)                                     |
| <i>iutA</i>                                 | 302                | F GGCTGGACATCATGGGAACTGG<br>R CGTCGGGAACGGGTAGAAATCG               | (3)                                     |
| <i>sitA†</i>                                | 608                | F AGGGGGCACAACCTGATTCTCG<br>R TACCGGGCCGTTTTCTGTGC                 | (9)                                     |
| <i>traT*</i>                                | 290                | F GGTGTGGTGGGATGAGCACAG<br>R CACGGTTCAGCCATCCCTGAG                 | (3)                                     |
| <i>tsh‡</i>                                 | 420                | F GGGAAATGACCTGAATGCTGG<br>R CCGTTCATCAGTCAGTACCAC                 | (7)                                     |
| <i>iss</i>                                  | 323                | F CAGCAACCCGAACCACTTGATG<br>R AGCATTGCCAGAGCGGCAGAA                | (6)                                     |
| <i>ompTp</i>                                | 496                | F TCATCCCGGAAGCCTCCCTCACTACTAT<br>R TAGCGTTTGCTGCACTGGCTTCTGATAC   | Plasmid-encoded outer membrane protease |
| <i>cbi</i>                                  | 430                | F ACAAGACAGCACCAGTTATGGGTATT<br>R GTTGTTGGTTTTGTTGGCGTAGTTAT       | Colicin B immunity                      |
| <i>cma</i>                                  | 498                | F CAGCGCCATTACCCCATAAATAGTGA<br>R GGTTTCGTTCCGGGTGTAAGCGTTAG       | Colicin M activity                      |
| <b><u>Chromosomally Encoded Traits:</u></b> |                    |                                                                    |                                         |
| <b><u>Adhesins:</u></b>                     |                    |                                                                    |                                         |
| <i>bmaE</i>                                 | 507                | F ATGGCGCTAACTTGCCATGCTG<br>R AGGGGGACATATAGCCCCCTTC               | (3)                                     |
| <i>fimH</i>                                 | 508                | F TCGAGAACGGATAAGCCGTGG<br>R GCAGTCACCTGCCCTCCGGTA                 | (3)                                     |
| <i>focG</i>                                 | 364                | F CAGCACAGGCAGTGGATACGA<br>R GAATGTCGCCTGCCATTGCT                  | (3)                                     |

|    |                         |      |                                |             |
|----|-------------------------|------|--------------------------------|-------------|
| 1  | <i>gafD</i>             | 952  | F TGTTGGACCGTCTCAGGGCTC        | (3)         |
| 2  |                         |      | R TCCCGGAACTCGCTGTTACT         |             |
| 3  |                         |      |                                |             |
| 4  | <i>papA</i>             | 717  | F ATGGCAGTGGTGTGTTTTGGTG       | (3)         |
| 5  |                         |      | R CGTCCCACCATACGTGCTCTTC       |             |
| 6  |                         |      |                                |             |
| 7  | <i>papC</i>             | 205  | F GTGGCAGTATGAGTAATGACCGTTA    | (3)         |
| 8  |                         |      | R ATATCCTTTCTGCAGGGATGCAATA    |             |
| 9  |                         |      |                                |             |
| 10 | <i>papEF</i>            | 326  | F GCAACAGCAACGCTGGTTGCATCAT    | (3)         |
| 11 |                         |      | R AGAGAGAGCCACTCTTATACGGACA    |             |
| 12 |                         |      |                                |             |
| 13 | <i>papG</i> allele I§   | 461  | F TCGTGCTCAGGTCCGGAATTT        | (3)         |
| 14 |                         |      | R TGGCATCCCCCAACATTATCG        |             |
| 15 |                         |      |                                |             |
| 16 | <i>papG</i> allele I'§  | 479  | F CTA CTATAGTTCATGCTCAGGTC     | (3)         |
| 17 |                         |      | R CCTGCATCCTCCACCATTATCGA      |             |
| 18 |                         |      |                                |             |
| 19 | <i>papG</i> allele II§  | 190  | F GGGATGAGCGGGCCTTTGAT         | (3)         |
| 20 |                         |      | R CGGGCCCCCAAGTAACTCG          |             |
| 21 |                         |      |                                |             |
| 22 | <i>papG</i> allele III§ | 258  | F GGCCTGCAATGGATTTACCTGG       | (3)         |
| 23 |                         |      | R CCACCAAATGACCATGCCAGAC       |             |
| 24 |                         |      |                                |             |
| 25 | <i>papG1*</i>           | 1140 | F CTGTAATTACGGAAGTGATTTCTG     |             |
| 26 |                         |      | R TTCCAGAAATAGCTCATGTAACCCG    |             |
| 27 | <i>papG2/3</i>          | 1070 | R ACTATCCGGCTCCGGATAAACCAT     |             |
| 28 |                         |      |                                |             |
| 29 | <i>sfaS</i>             | 244  | F GTGGATACGACGATTACTGTG        | (3)         |
| 30 |                         |      | R CCGCCAGCATTCCCTGTATTC        |             |
| 31 |                         |      |                                |             |
| 32 | <i>sfa-foc</i>          | 410  | F CTCCGGAGAACTGGGTGCATCTTAC    | (3)         |
| 33 |                         |      | R CGGAGGAGTAATTACAAACCTGGCA    |             |
| 34 |                         |      |                                |             |
| 35 | <i>adhC</i>             | 411  | F GTCGGCGAGGGCGTCACCAGCCTGAAGC | (4)         |
| 36 |                         |      | R GGCCGCGCCCTGAATCACCGCCAGACC  |             |
| 37 |                         |      |                                |             |
| 38 | <i>eaeH</i>             | 605  | F AAAAGCCGCTGGTGCTGTCTCTGC     | EAE Locus   |
| 39 |                         |      | R AAGCGGCCCGGCAACAAACTTC       |             |
| 40 |                         |      |                                |             |
| 41 | <i>aufA</i>             | 515  | F CCGCGCTGAAATCATGGGTCTGATG    | Auf fimbria |
| 42 |                         |      | R TGGGGCGGATACTGACTGGAGCAC     |             |
| 43 |                         |      |                                |             |
| 44 | <i>aufC</i>             | 298  | F CGCCAACGCCCGGTAATCCTC        | Auf fimbria |
| 45 |                         |      | R GCCGCCGGGACCGTTTGAGAT        |             |
| 46 |                         |      |                                |             |
| 47 | <i>aufE</i>             | 269  | F CAAGCCCCTCTACCGAGCCATCTT     | Auf fimbria |
| 48 |                         |      | R TCATGCCGGAGTGGTTCGTATTGA     |             |
| 49 |                         |      |                                |             |
| 50 | <i>aufG</i>             | 453  | F TCGCCCCTGATCGCGTGTAATA       | Auf fimbria |
| 51 |                         |      | R CCGCCACCATTAGCCGTCTTTGTG     |             |
| 52 |                         |      |                                |             |
| 53 |                         |      |                                |             |
| 54 |                         |      |                                |             |
| 55 |                         |      |                                |             |
| 56 |                         |      |                                |             |

|    |                              |      |                                                                                                                            |             |
|----|------------------------------|------|----------------------------------------------------------------------------------------------------------------------------|-------------|
| 1  | <b><u>Iron-Related:</u></b>  |      |                                                                                                                            |             |
| 2  |                              |      |                                                                                                                            |             |
| 3  | <i>feoB</i>                  | 470  | F AATTGGCGTGCATGAAGATAACTG<br>R AGCTGGCGACCTGATAGAACAATG                                                                   | (9)         |
| 4  |                              |      |                                                                                                                            |             |
| 5  |                              |      |                                                                                                                            |             |
| 6  | <i>fyuA</i>                  | 787  | F TGATTAACCCCGCGACGGGAA<br>R CGCAGTAGGCACGATGTTGTA                                                                         | (3)         |
| 7  |                              |      |                                                                                                                            |             |
| 8  |                              |      |                                                                                                                            |             |
| 9  | <i>fyuA1</i>                 | 390  | F AACCCCGCCGTCACCCTGTATGTC<br>R GTCCGGCGCCAGACGCAGTTT                                                                      |             |
| 10 |                              |      |                                                                                                                            |             |
| 11 |                              |      |                                                                                                                            |             |
| 12 | <i>ireA</i>                  | 254  | F GATGACTCAGCCACGGGTAA<br>R CCAGGACTCACCTCACGAAT                                                                           | (8)         |
| 13 |                              |      |                                                                                                                            |             |
| 14 |                              |      |                                                                                                                            |             |
| 15 | <i>irp-2</i>                 | 287  | F AAGGATTCGCTGTTACCGGAC<br>R TCGTCGGGCAGCGTTTCTTCT                                                                         | (1)         |
| 16 |                              |      |                                                                                                                            |             |
| 17 |                              |      |                                                                                                                            |             |
| 18 | <b><u>Protectins:</u></b>    |      |                                                                                                                            |             |
| 19 |                              |      |                                                                                                                            |             |
| 20 | <i>kpsMT KI</i>              | 153  | F TAGCAAACGTTCTATTGGTGC<br>R CATCCAGACGATAAGCATGAGCA                                                                       | (3)         |
| 21 |                              |      |                                                                                                                            |             |
| 22 |                              |      |                                                                                                                            |             |
| 23 | <i>kpsMT II</i>              | 272  | F GCGCATTTGCTGATACTGTTG<br>R CATCCAGACGATAAGCATGAGCA                                                                       | (3)         |
| 24 |                              |      |                                                                                                                            |             |
| 25 |                              |      |                                                                                                                            |             |
| 26 | <i>kpsMT III</i>             | 392  | F TCCTCTTGCTACTATTCCCCT<br>R AGGCGTATCCATCCCTCCTAAC                                                                        | (3)         |
| 27 |                              |      |                                                                                                                            |             |
| 28 |                              |      |                                                                                                                            |             |
| 29 | <b><u>Toxins:</u></b>        |      |                                                                                                                            |             |
| 30 | <i>cdtB</i>                  | 430  | F GAAAATAAATGGAACACACATGTCCG<br>F' GAAAGTAAATGGAATATAAATGTCCG<br>R AAATCTCCTGCAATCATCCAGTTA<br>R' AAATCACCAAGAATCATCCAGTTA | (3)         |
| 31 |                              |      |                                                                                                                            |             |
| 32 |                              |      |                                                                                                                            |             |
| 33 |                              |      |                                                                                                                            |             |
| 34 |                              |      |                                                                                                                            |             |
| 35 | <i>cnf-1</i>                 | 1105 | F ATCTTATACTGGATGGGATCATCTTGG<br>R GCAGAACGACGTTCTTCATAAGTATC                                                              | (3)         |
| 36 |                              |      |                                                                                                                            |             |
| 37 |                              |      |                                                                                                                            |             |
| 38 | <i>hlyD</i>                  | 904  | F CTCCGGTACGTGAAAAGGAC<br>R GCCCTGATTACTGAAGCCTG                                                                           | (8)         |
| 39 |                              |      |                                                                                                                            |             |
| 40 |                              |      |                                                                                                                            |             |
| 41 | <i>hlyF</i>                  | 599  | F GGCGATTTAGGCATTCCGATACTC<br>R ACGGGGTCGCTAGTTAAGGAG                                                                      | Hemolysin F |
| 42 |                              |      |                                                                                                                            |             |
| 43 |                              |      |                                                                                                                            |             |
| 44 | <b><u>Miscellaneous:</u></b> |      |                                                                                                                            |             |
| 45 | <i>fliC (H7)</i>             | 547  | F ACGATGCAGGCAACTTGACG<br>R GGGTTGGTCGTTGCAGAACC                                                                           | (8)         |
| 46 |                              |      |                                                                                                                            |             |
| 47 |                              |      |                                                                                                                            |             |
| 48 | <i>ibeA</i>                  | 171  | F AGGCAGGTGTGCGCCGCGTAC<br>R TGGTGCTCCGGCAAACCATGC                                                                         | (3)         |
| 49 |                              |      |                                                                                                                            |             |
| 50 |                              |      |                                                                                                                            |             |
| 51 | <i>ompT</i>                  | 559  | F ATCTAGCCGAAGAAGGAGGC<br>R CCCGGGTCATAGTGTTTCATC                                                                          | (8)         |
| 52 |                              |      |                                                                                                                            |             |
| 53 |                              |      |                                                                                                                            |             |
| 54 | <i>malX PAI</i>              | 925  | F GGACATCCTGTTACAGCGCGCA<br>R TCGCCACCAATCACAGCCGAAC                                                                       | (3)         |
| 55 |                              |      |                                                                                                                            |             |
| 56 |                              |      |                                                                                                                            |             |

|    |                 |     |                                                                  |                                  |
|----|-----------------|-----|------------------------------------------------------------------|----------------------------------|
| 1  | <i>gimB</i>     | 619 | F AAAAGCCGCCAGGAATCAGAAGAACAA<br>R TTACCCACAAAAGGCCGGGAGTGATAA   | ExPEC Gim B island               |
| 2  |                 |     |                                                                  |                                  |
| 3  |                 |     |                                                                  |                                  |
| 4  | O2ColV39        | 437 | F TACTGCCCGGTGTGATATTTCCAACAAA<br>R TAAGATTGACAATTGCAGGACCGTAACC | ColV hypothetical gene           |
| 5  |                 |     |                                                                  |                                  |
| 6  |                 |     |                                                                  |                                  |
| 7  | <i>vat</i>      | 370 | F GAGGCCGGCGACCAGTGGTTCTCCATTA<br>R TGAACCGGCACCCTGCGTGACAGAGTTT | Vacuolating<br>autotransporter   |
| 8  |                 |     |                                                                  |                                  |
| 9  |                 |     |                                                                  |                                  |
| 10 | 1024UI          | 598 | F GGCTTTCCCGCCTTCTTTTACCACTACG<br>R GGACGGCGACGTTGTGTTATTCGGTAAT | Inc FIB<br>recombinase/integrase |
| 11 |                 |     |                                                                  |                                  |
| 12 |                 |     |                                                                  |                                  |
| 13 | 1051UI          | 664 | F CACGCCGTTACTGGTCGCGGAAAAAT<br>R AACCCACGGCCTCTATTGGCGAAGAACT   | ColV gene                        |
| 14 |                 |     |                                                                  |                                  |
| 15 |                 |     |                                                                  |                                  |
| 16 | <i>parB</i>     | 534 | F TCGTGGCCGAGTTCTTGGCAACAGC<br>R GCGGCCTGAAACGCACGAGTCACTTT      | Inc FIB<br>Plasmid partitioning  |
| 17 |                 |     |                                                                  |                                  |
| 18 |                 |     |                                                                  |                                  |
| 19 | <i>umuC</i>     | 474 | F CCGCCGTACGGAAAACTGCTGTCACTG<br>R ACGGCAGCGGCAATGATGTCCTGTGTAT  | UV protection gene               |
| 20 |                 |     |                                                                  |                                  |
| 21 |                 |     |                                                                  |                                  |
| 22 | <i>rfc</i>      | 788 | F ATCCATCAGGAGGGGACTGGA<br>R AACCATACCAACCAATGCGAG               | O antigen polymerase             |
| 23 |                 |     |                                                                  |                                  |
| 24 |                 |     |                                                                  |                                  |
| 25 | <i>iha</i>      | 829 | F CTGGCGGAGGCTCTGAGATCA<br>R TCCTTAAGCTCCCGCGGCTGA               | UPEC Island                      |
| 26 |                 |     |                                                                  |                                  |
| 27 |                 |     |                                                                  |                                  |
| 28 | <i>afa</i>      | 594 | F GGCAGAGGGCCGCAACAGGC<br>R CCCGTAACGCGCCAGCATCTC                | Afimbrial adhesin Afa            |
| 29 |                 |     |                                                                  |                                  |
| 30 |                 |     |                                                                  |                                  |
| 31 | <i>etsA</i>     | 450 | F CAACTGGGCGGGAACGAAATCAGGA<br>R TCAGTTCCGCGCTGGCAACAACCTAC      | <i>E. coli</i> transport system  |
| 32 |                 |     |                                                                  |                                  |
| 33 |                 |     |                                                                  |                                  |
| 34 | <i>etsB</i>     | 537 | F CAGCAGCGCTTCGGACAAAATCTCCT<br>R TTCCCCACCACTCTCCGTTCTCAAAC     | <i>E. coli</i> transport system  |
| 35 |                 |     |                                                                  |                                  |
| 36 |                 |     |                                                                  |                                  |
| 37 | <i>eitA</i>     | 284 | F ACGCCGGGTTAATAGTTGGGAGATAG<br>R ATCGATAGCGTCAGCCCGGAAGTTAG     | <i>E. coli</i> iron transport    |
| 38 |                 |     |                                                                  |                                  |
| 39 |                 |     |                                                                  |                                  |
| 40 | <i>eitB</i>     | 380 | F TGATGCCCCGCCAAACTCAAGA<br>R ATGCGCCGGCCTGACATAAGTGCTAA         | <i>E. coli</i> iron transport    |
| 41 |                 |     |                                                                  |                                  |
| 42 |                 |     |                                                                  |                                  |
| 43 | <i>blaTEM</i>   | 558 | F ATGTGCGCGGAACCCCTATTTGTTTA<br>R AAAAAGCGGTTAGCTCCTTCGGTCCT     | Ampicillin resistance            |
| 44 |                 |     |                                                                  |                                  |
| 45 |                 |     |                                                                  |                                  |
| 46 | <i>aac3 VIa</i> | 502 | F GGCACCCGCGACGCCCTGGTCCAAAAG<br>R GGGCCCGGCGCCGATCGACAGGATTT    | Gentamicin resistance            |
| 47 |                 |     |                                                                  |                                  |
| 48 |                 |     |                                                                  |                                  |
| 49 | <i>aac3 VIb</i> | 302 | F GGGCAAGCGCCGCGTCACTTATT<br>R CGCGGCGTTGTTTCGGCTTCA             | Gentamicin resistance            |
| 50 |                 |     |                                                                  |                                  |
| 51 |                 |     |                                                                  |                                  |
| 52 | <i>tetA</i>     | 372 | F CGGGGCGACTGGGGCGGTAGC<br>R CAAAGCGCGCCGGCACCTGT                | Tetracycline resistance          |
| 53 |                 |     |                                                                  |                                  |
| 54 |                 |     |                                                                  |                                  |
| 55 | <i>tetB</i>     | 446 | F AACCGGTGAAGTGGTTCGGTTGGT<br>R TTCGCCCCATTTAGTGGCTATTCTTC       | Tetracycline resistance          |
| 56 |                 |     |                                                                  |                                  |

|    |               |     |                                                                  |                         |
|----|---------------|-----|------------------------------------------------------------------|-------------------------|
| 1  | <i>groEL</i>  | 318 | F CGCCGGCATGAACCCGATGGACCTCA<br>R TCGGCCTGCATCGACTGCGGGTTGTTG    | Chaperone               |
| 2  |               |     |                                                                  |                         |
| 3  |               |     |                                                                  |                         |
| 4  | <i>aph3IA</i> | 378 | F TCGGGCAATCAGGTGCGACAATCTA<br>R TGCCAGCGCATCAACAATATTTTCACC     | Gentamicin resistance   |
| 5  |               |     |                                                                  |                         |
| 6  |               |     |                                                                  |                         |
| 7  | <i>terD</i>   | 231 | F CCACTGCGCGGAATTTCCACTCACCAT<br>R ACGCCGTCCCGTCTGATGTTGACAAG    | Tellurite resistance    |
| 8  |               |     |                                                                  |                         |
| 9  |               |     |                                                                  |                         |
| 10 | <i>terF</i>   | 428 | F CCGACAAACTTCCAGAAGATGGGGTAGT<br>R GAGGCAGCGGTTGCATTTGACTTGACG  | Tellurite resistance    |
| 11 |               |     |                                                                  |                         |
| 12 |               |     |                                                                  |                         |
| 13 | <i>terX</i>   | 576 | F ATGCGCCGCTGCCTGTTTACCTTGTTA<br>R CGCGCTTGCTGCCGGAAGACA         | Tellurite resistance    |
| 14 |               |     |                                                                  |                         |
| 15 |               |     |                                                                  |                         |
| 16 | <i>terY3</i>  | 302 | F CCTGGGGCCGTCAGCGGACCTG<br>R TCCTTGCTGGTGGCCGTTTCATACTTCAT      | Tellurite resistance    |
| 17 |               |     |                                                                  |                         |
| 18 |               |     |                                                                  |                         |
| 19 | <i>pcoA</i>   | 507 | F ATCCGGAAGGTCAGCACCGTCCATAGAC<br>R GACCTCGCGGATGTCAGTGGCTACACCT | Copper resistance       |
| 20 |               |     |                                                                  |                         |
| 21 |               |     |                                                                  |                         |
| 22 | <i>pcoD</i>   | 502 | F GGCGCCAGAAATGATAATCGCAACA<br>R GGGCGTGGCGCTGGCTACACTT          | Copper resistance       |
| 23 |               |     |                                                                  |                         |
| 24 |               |     |                                                                  |                         |
| 25 | <i>pcoE</i>   | 385 | F GTGGGGCAGCTTTTGCTCAGTCCAGTGA<br>R CGAAGCTTTCTTGCTGCGTCTGATGTG  | Copper resistance       |
| 26 |               |     |                                                                  |                         |
| 27 |               |     |                                                                  |                         |
| 28 | <i>dfr1</i>   | 328 | F ATCGGGAATGGCCCTGATA<br>R CTTCGGCTCGATGTCTATTGTAG               | Trimethoprim resistance |
| 29 |               |     |                                                                  |                         |
| 30 |               |     |                                                                  |                         |
| 31 | <i>dfr7</i>   | 214 | F TCTTTAAAGCGCTCACATATAATCAGTG<br>R ATTTGACCGCCACCAGAGACA        | Trimethoprim resistance |
| 32 |               |     |                                                                  |                         |
| 33 |               |     |                                                                  |                         |
| 34 | <i>dfr17</i>  | 243 | F ATATCCCGTGGTCAGTAAAAGGTG<br>R GACCCCCGCCAGAGACATA              | Trimethoprim resistance |
| 35 |               |     |                                                                  |                         |
| 36 |               |     |                                                                  |                         |
| 37 | <i>arsC</i>   | 153 | F CCAGCCTGCGGCACCTCGCGTAATAC<br>R ACGCAGCAGCGCTCGTACTGAAATACCC   | Arsenic resistance      |
| 38 |               |     |                                                                  |                         |
| 39 |               |     |                                                                  |                         |
| 40 | <i>silE</i>   | 364 | F TCGGCCTGGGCCACTGAAACCGTGAATA<br>R GCGGGTGCCTTCGGCCATAGCCTGATG  | Silver resistance       |
| 41 |               |     |                                                                  |                         |
| 42 |               |     |                                                                  |                         |
| 43 | <i>silP</i>   | 603 | F ACACCCCGGCCTGGGCTCCTT<br>R TGCGGGCACGGAACAAACCTC               | Silver resistance       |
| 44 |               |     |                                                                  |                         |
| 45 |               |     |                                                                  |                         |
| 46 | <i>sulI</i>   | 462 | F CGCCGCTCTTAGACGCCCTGTCC<br>R CAACGGTGGCGCCCAAGAAGGAT           | Sulfa resistance        |
| 47 |               |     |                                                                  |                         |
| 48 |               |     |                                                                  |                         |
| 49 | <i>merA</i>   | 250 | F GATCCGCGCCGCCATATCGCCATCTG<br>R CACGCGCTCGCCGCCGTCGTTGAGTTG    | Mercury resistance      |
| 50 |               |     |                                                                  |                         |
| 51 |               |     |                                                                  |                         |
| 52 | <i>intI1</i>  | 545 | F CACTCCGGCACCGCCAACTTTC<br>R GAACGGGCATGCGGATCAGTGAG            | Integrase               |
| 53 |               |     |                                                                  |                         |
| 54 |               |     |                                                                  |                         |
| 55 | <i>iseC12</i> | 404 | F CGCGGCCACGTAAACCGAAAGATAAA<br>R GCGCGGGTGCACAGCAACCTC          | Transposase             |
| 56 |               |     |                                                                  |                         |

|    |                                       |     |                                                                    |                                           |
|----|---------------------------------------|-----|--------------------------------------------------------------------|-------------------------------------------|
| 1  | <i>aadA</i>                           | 365 | F TAACGGCGCAGTGGCGGTTTTCA<br>R AAGCTCGCCGCGTTGTTTCATCAAG           | Aminoglycoside<br>resistance              |
| 2  |                                       |     |                                                                    |                                           |
| 3  |                                       |     |                                                                    |                                           |
| 4  | <i>qacE delta</i>                     | 250 | F TCGGCCTCCGCAGCGACTTCC<br>F CTTGCCCTTCCGCCGTTGTCTAAT              | Quaternary<br>ammonium compounds          |
| 5  |                                       |     |                                                                    |                                           |
| 6  |                                       |     |                                                                    |                                           |
| 7  | <i>qnr</i>                            | 440 | F TCGCCGCTGCCGCTTTTATCAGT<br>R GCCAACAGTCGCGGGAGAAGGTG             | qnr plasmid<br>fluoroquinolone resistance |
| 8  |                                       |     |                                                                    |                                           |
| 9  |                                       |     |                                                                    |                                           |
| 10 | <b><u>Plasmid-Replicon Types:</u></b> |     |                                                                    |                                           |
| 11 |                                       |     |                                                                    |                                           |
| 12 | B/O                                   | 159 | F GCGGTCCGGAAAGCCAGAAAAC<br>R TCTGCGTTCGGCCAAGTTCGA                | (5)                                       |
| 13 |                                       |     |                                                                    |                                           |
| 14 |                                       |     |                                                                    |                                           |
| 15 | FIC                                   | 262 | F GTGAACTGGCAGATGAGGAAGG<br>R TTCTCCTCGTCGCCAACTAGAT               | (5)                                       |
| 16 |                                       |     |                                                                    |                                           |
| 17 |                                       |     |                                                                    |                                           |
| 18 | A/C                                   | 465 | F GAGAACCAAAGACAAAGACCTGGA<br>R ACGACAAACCTGAATTGCCTCCTT           | (5)                                       |
| 19 |                                       |     |                                                                    |                                           |
| 20 |                                       |     |                                                                    |                                           |
| 21 | P                                     | 534 | F CTATGGCCCTGCAAACGCGCCAGAAA<br>R TCACGCGCCAGGGCGCAGCC             | (5)                                       |
| 22 |                                       |     |                                                                    |                                           |
| 23 |                                       |     |                                                                    |                                           |
| 24 | T                                     | 750 | F TTGGCCTGTTTGTGCCTAAACCAT<br>R CGTTGATTACACTTAGCTTTGGAC           | (5)                                       |
| 25 |                                       |     |                                                                    |                                           |
| 26 |                                       |     |                                                                    |                                           |
| 27 | K/B                                   | 160 | F GCGGTCCGGAAAGCCAGAAAAC<br>R TCTTTCACGAGCCCGCCAAA                 | (5)                                       |
| 28 |                                       |     |                                                                    |                                           |
| 29 |                                       |     |                                                                    |                                           |
| 30 | W                                     | 242 | F CCTAAGAACAACAAAGCCCCCG<br>R GGTGCGCGGCATAGAACCGT                 | (5)                                       |
| 31 |                                       |     |                                                                    |                                           |
| 32 |                                       |     |                                                                    |                                           |
| 33 | FIIA                                  | 270 | F CTGTCGTAAGCTGATGGC<br>R CTCTGCCACAACTTCAGC                       | (5)                                       |
| 34 |                                       |     |                                                                    |                                           |
| 35 |                                       |     |                                                                    |                                           |
| 36 | FIA                                   | 462 | F CCATGCTGGTTCTAGAGAAGGTG<br>R GTATATCCTTACTGGCTTCCGCAG            | (5)                                       |
| 37 |                                       |     |                                                                    |                                           |
| 38 |                                       |     |                                                                    |                                           |
| 39 | FIB                                   | 702 | F GGAGTTCTGACACACGATTTTCTG<br>R CTCCCGTCGCTTCAGGGCATT              | (5)                                       |
| 40 |                                       |     |                                                                    |                                           |
| 41 |                                       |     |                                                                    |                                           |
| 42 | Y                                     | 765 | F AATTCAAACAACACTGTGCAGCCTG<br>R GCGAGAATGGACGATTACAAACTTT         | (5)                                       |
| 43 |                                       |     |                                                                    |                                           |
| 44 |                                       |     |                                                                    |                                           |
| 45 | II                                    | 139 | F CGAAAGCCGGACGGCAGAA<br>R TCGTCGTTCCGCCAAGTTCGT                   | (5)                                       |
| 46 |                                       |     |                                                                    |                                           |
| 47 |                                       |     |                                                                    |                                           |
| 48 | X                                     | 376 | F AACCTTAGAGGCTATTTAAGTTGCTGAT<br>R TGAGAGTCAATTTTTATCTCATGTTTTAGC | (5)                                       |
| 49 |                                       |     |                                                                    |                                           |
| 50 |                                       |     |                                                                    |                                           |
| 51 | III                                   | 471 | F GGAGCGATGGATTACTTCAGTAC<br>R TGCCGTTTCACCTCGTGAGTA               | (5)                                       |
| 52 |                                       |     |                                                                    |                                           |
| 53 |                                       |     |                                                                    |                                           |
| 54 | N                                     | 559 | F GTCTAACGAGCTTACCGAAG<br>R GTTTCAACTCTGCCAAGTTC                   | (5)                                       |
| 55 |                                       |     |                                                                    |                                           |
| 56 |                                       |     |                                                                    |                                           |

|    |                                                            |     |                                                                     |                        |
|----|------------------------------------------------------------|-----|---------------------------------------------------------------------|------------------------|
| 1  | HIII                                                       | 644 | F TTTCTCCTGAGTCACCTGTTAACAC<br>R GGCTCACTACCGTTGTCATCCT             | (5)                    |
| 2  |                                                            |     |                                                                     |                        |
| 3  |                                                            |     |                                                                     |                        |
| 4  | L/M                                                        | 785 | F GGATGAAAACACTATCAGCATCTGAAG<br>R CTGCAGGGGCGATTCTTTAGG            | (5)                    |
| 5  |                                                            |     |                                                                     |                        |
| 6  |                                                            |     |                                                                     |                        |
| 7  |                                                            |     |                                                                     |                        |
| 8  | <b><u>APEC O1 Genomic Islands of Unknown Function:</u></b> |     |                                                                     |                        |
| 9  |                                                            |     |                                                                     |                        |
| 10 | 1712                                                       | 392 | F TACCGGCGTGATGGCCACCTACA<br>R AAACAACGCCGGTTCCTGCCTACCAG           | APEC O1 genomic island |
| 11 |                                                            |     |                                                                     |                        |
| 12 |                                                            |     |                                                                     |                        |
| 13 | 1717                                                       | 313 | F AAGCTATCCCGACTTGCTCTCGCTGTAA<br>R AAGGCGCTGGCACTGCAACAACACTAC     | APEC O1 genomic island |
| 14 |                                                            |     |                                                                     |                        |
| 15 |                                                            |     |                                                                     |                        |
| 16 | 1718                                                       | 468 | F AGCGGTCACAGTGGCTTTCATAGGTG<br>R GCCCCGCTTTCCAGGCACAC              | APEC O1 genomic island |
| 17 |                                                            |     |                                                                     |                        |
| 18 |                                                            |     |                                                                     |                        |
| 19 | 1716                                                       | 533 | F CAGGGATTTCGCTTGCCCTCTTCTGTGTA<br>R CGACCGCCGGGATTTTAACCATAC       | APEC O1 genomic island |
| 20 |                                                            |     |                                                                     |                        |
| 21 |                                                            |     |                                                                     |                        |
| 22 | 1721                                                       | 215 | F GGTGGCGAGATAACCGACGTAGTGGT<br>R CCCCTGGCGAATGGAAAACAGAGAT         | APEC O1 genomic island |
| 23 |                                                            |     |                                                                     |                        |
| 24 |                                                            |     |                                                                     |                        |
| 25 | 1713                                                       | 366 | F CCGGCTCAGGAGAGTCTGTTAATACTACT<br>R TGATAGCCCGCTCCAGATTTTCTTTAG    | APEC O1 genomic island |
| 26 |                                                            |     |                                                                     |                        |
| 27 |                                                            |     |                                                                     |                        |
| 28 | 1724                                                       | 266 | F TTGACCTGTACCCGCATAAACACTGGTT<br>R TGCGAGAGGTGCTTAACGCGATTTTC      | APEC O1 genomic island |
| 29 |                                                            |     |                                                                     |                        |
| 30 |                                                            |     |                                                                     |                        |
| 31 | 1753                                                       | 358 | F CCCACAGGCCGCTCCACAG<br>R TGCCCGATAGGCGAAGATGGGTTAT                | APEC O1 genomic island |
| 32 |                                                            |     |                                                                     |                        |
| 33 |                                                            |     |                                                                     |                        |
| 34 | 1756                                                       | 446 | F CTGGCCCAACCCACCGTTATCTT<br>R ATGGCCGGGTACGGGTGAAGTTTC             | APEC O1 genomic island |
| 35 |                                                            |     |                                                                     |                        |
| 36 |                                                            |     |                                                                     |                        |
| 37 | 1757                                                       |     | F ATCGGCACCAGAAGTACCGGATTTGA<br>R GTCGGCAATATCTACGTGCAGGGACAC       | APEC O1 genomic island |
| 38 |                                                            |     |                                                                     |                        |
| 39 |                                                            |     |                                                                     |                        |
| 40 | 1761                                                       | 310 | F GGAGGCGGCGGGTTTTGACAA<br>R GTATTCCGCCATCCGCCATCC                  | APEC O1 genomic island |
| 41 |                                                            |     |                                                                     |                        |
| 42 |                                                            |     |                                                                     |                        |
| 43 | 1767                                                       | 529 | F AGCGGCGTCTGCTGCTTACTCTG<br>R CCGGCACCGGGGAGAAAATGA                | APEC O1 genomic island |
| 44 |                                                            |     |                                                                     |                        |
| 45 |                                                            |     |                                                                     |                        |
| 46 | 1770                                                       | 573 | F GTCAGCCGCTGGACCCCTATGAT<br>R TATCGCCGCTTCCCTCGCCTTATC             | APEC O1 genomic island |
| 47 |                                                            |     |                                                                     |                        |
| 48 |                                                            |     |                                                                     |                        |
| 49 | 1771                                                       | 250 | F CTGAGCCGTGCGCAGAATGTCAAC<br>R ACTCTTCCGCTGCCCTGGACTGT             | APEC O1 genomic island |
| 50 |                                                            |     |                                                                     |                        |
| 51 |                                                            |     |                                                                     |                        |
| 52 | 4460                                                       | 410 | F AGCCGGGCGGTCATGCTGAGTTATGGATTA<br>R CCAGCGAGGAACGGCAAGATGCTTACCAA | APEC O1 genomic island |
| 53 |                                                            |     |                                                                     |                        |
| 54 |                                                            |     |                                                                     |                        |
| 55 | 4464                                                       | 355 | F ATCGCCGCGCCTCGGAGTCCTGT<br>R CTCCACGCGCCAGCGCCTCAAG               | APEC O1 genomic island |
| 56 |                                                            |     |                                                                     |                        |

|    |               |     |                                    |                        |
|----|---------------|-----|------------------------------------|------------------------|
| 1  | 4467          | 463 | F CGAGGTCGGCGTGGCTGGCTTCCT         | APEC O1 genomic island |
| 2  |               |     | R TCCCGCCCGGTCTGGATTGGTTACGAC      |                        |
| 3  |               |     |                                    |                        |
| 4  | 4468          | 277 | F ACCGCCCTGACCGAAAAGGTGAAATCCATT   | APEC O1 genomic island |
| 5  |               |     | R CTTTACTGCGGCGCTGCTGGGTCAGACTTT   |                        |
| 6  |               |     |                                    |                        |
| 7  | 4472          | 317 | F GCCGCAAATCCGGGACTGGCTGAACT       | APEC O1 genomic island |
| 8  |               |     | R ATACCGCACACCGCAGGCAGTGACAGG      |                        |
| 9  |               |     |                                    |                        |
| 10 | 4480          | 515 | F CGCGCAGTTTTGACGGGCGAATGAC        | APEC O1 genomic island |
| 11 |               |     | R GACCCGGCGACGCTTAAGCCCTCAAAC      |                        |
| 12 |               |     |                                    |                        |
| 13 | 11            | 227 | F GGCCGCTGTGGGAATTAATACCCGCAATCT   | APEC O1 genomic island |
| 14 |               |     | R CCGCCGCCGCAATCCCCACAC            |                        |
| 15 |               |     |                                    |                        |
| 16 | 12            | 159 | F TATGCGCCAGACGCTGCCACACCAGAC      | APEC O1 genomic island |
| 17 |               |     | R CCGCCGGTCAGTTCGGGATAAAGCACAC     |                        |
| 18 |               |     |                                    |                        |
| 19 | 516           | 404 | F TTTTTGCATTGGTGGCGGAGCGTGGTAT     | APEC O1 genomic island |
| 20 |               |     | R TATCGGCCAGGCGGGGAGTAAGTTTGTGTCAT |                        |
| 21 |               |     |                                    |                        |
| 22 | 517           | 308 | F GTCGCGTTATGGCGGCTGAAGTGCTCAA     | APEC O1 genomic island |
| 23 |               |     | R GCCCGACGGCTCATAAACAGGCGTATCAA    |                        |
| 24 |               |     |                                    |                        |
| 25 | 520           | 495 | F TATGAGGGGCAAGGTGCGACAGCTAACAGC   | APEC O1 genomic island |
| 26 |               |     | R ACGCCGGGCGGCAGCCTTATCCT          |                        |
| 27 |               |     |                                    |                        |
| 28 | 522           | 437 | F ATCCGCCATATTATGCCCGTTCGAGTTGAA   | APEC O1 genomic island |
| 29 |               |     | R AGAAGTTTAGCGCCGGCATGACGCATCTG    |                        |
| 30 |               |     |                                    |                        |
| 31 | 525           | 236 | F GTACCGGGCCGTCAGCTCCGAATACC       | APEC O1 genomic island |
| 32 |               |     | R ACGGCGCGGAAGCACCGAAATACA         |                        |
| 33 |               |     |                                    |                        |
| 34 | 530           | 364 | F TGTCCCCGCAGGTTCTGGTTCAAACTCAT    | APEC O1 genomic island |
| 35 |               |     | R GAGCCATCCGGGAGCCACCAATCTCATTAT   |                        |
| 36 |               |     |                                    |                        |
| 37 | 532           | 532 | F TGGCTGCGGCGCTAAGAAATCTTGAACAAC   | APEC O1 genomic island |
| 38 |               |     | R GCCGGGCCAATCCCACCGAACATA         |                        |
| 39 |               |     |                                    |                        |
| 40 | 1177          | 197 | F CGCCGTCGCTGCGGGTGATGGTAA         | APEC O1 genomic island |
| 41 |               |     | R GTCACTGGCCGGAATTAATAATCCCGCACAT  |                        |
| 42 |               |     |                                    |                        |
| 43 | 1179          | 242 | F CTGCCGTGCCTTTTCAAGTGCATGACCAGT   | APEC O1 genomic island |
| 44 |               |     | R CCGGCGAAGCGGAAACACGAATGAGTAA     |                        |
| 45 |               |     |                                    |                        |
| 46 | No locus 17-3 | 418 | F TGCGCGGGTGCACAGCAACCTC           | APEC O1 genomic island |
| 47 |               |     | R CTGCGCGGCCACGTAAACCGAAAAGATAAA   |                        |
| 48 |               |     |                                    |                        |
| 49 | No locus 17-4 | 370 | F AGTTCGCCACCGCAATGAGTACGCCTTCA    | APEC O1 genomic island |
| 50 |               |     | R GGATTATTTCCCGGCTCGGCCATTCATTT    |                        |
| 51 |               |     |                                    |                        |
| 52 | 1180          | 322 | F CGCGCCCTGAAAACCGGCCATAACC        | APEC O1 genomic island |
| 53 |               |     | R GCGCCAGTGTGGACGGGGTGGAGA         |                        |
| 54 |               |     |                                    |                        |
| 55 | 1181          | 443 | F AGCGCCCTTAACTCTGCCTGGCTGAATGAG   | APEC O1 genomic island |
| 56 |               |     | R AGCCAGCCGTTTATTTCCCGAATCCTGTCC   |                        |



|    |      |     |                                                                    |                        |
|----|------|-----|--------------------------------------------------------------------|------------------------|
| 1  | 1184 | 285 | F CGCCGCGAGGCAATTTGCGTAGTTCAC<br>R ATGCGCTCAAAGAGGATGGCGACGAAAGAG  | APEC O1 genomic island |
| 2  |      |     |                                                                    |                        |
| 3  |      |     |                                                                    |                        |
| 4  | 1185 | 495 | F AGGAAACACAACGCGTGGCTGACGGGTAAG<br>R TCGCGGGGAGGTGCTTTGATGTCCTGTT | APEC O1 genomic island |
| 5  |      |     |                                                                    |                        |
| 6  |      |     |                                                                    |                        |
| 7  | 2314 | 164 | F GGCCCGCCGACGACGCAGCATA<br>R ACCGGCACACCTCCCGCAGTGAACG            | APEC O1 genomic island |
| 8  |      |     |                                                                    |                        |
| 9  |      |     |                                                                    |                        |
| 10 | 18-2 | 207 | F GGGGGATAGCACGAAAACAAACCTCA<br>R ATCGGGCAAGATTCAGTAGCGGAAGC       | APEC O1 genomic island |
| 11 |      |     |                                                                    |                        |
| 12 |      |     |                                                                    |                        |
| 13 | 2310 | 391 | F GTCACGGGAATGGCTTAATACACAGG<br>R GAGACCGCCTTTATTCTTTCTGAGG        | APEC O1 genomic island |
| 14 |      |     |                                                                    |                        |
| 15 |      |     |                                                                    |                        |
| 16 | 2301 | 561 | F ATCAGCGCGGCGACTTTACGGTTAGT<br>R CCTGCGGCAGATTATCTCCAGTGTG        | APEC O1 genomic island |
| 17 |      |     |                                                                    |                        |
| 18 |      |     |                                                                    |                        |
| 19 | 2291 | 335 | F TTCCGCCACGCACGGCAGGTTGTT<br>R CACATCCGCGCTCGCGCAAAGTGTC          | APEC O1 genomic island |
| 20 |      |     |                                                                    |                        |
| 21 |      |     |                                                                    |                        |
| 22 | 2277 | 681 | F TGAATGCCCGTATGACAAAGTAGGA<br>R GTTGCTTTGCGCTTGTCTTTTAGTCC        | APEC O1 genomic island |
| 23 |      |     |                                                                    |                        |
| 24 |      |     |                                                                    |                        |
| 25 | 2291 | 456 | F CGCCGGTGCGCCCAACTG<br>R GCGATTTCCGCCCGCTCTT                      | APEC O1 genomic island |
| 26 |      |     |                                                                    |                        |
| 27 |      |     |                                                                    |                        |
| 28 | 2271 | 501 | F TGGGCCCCGGCAACCACAA<br>R TGAGGGGGCTGCCAGTGAAAATGAC               | APEC O1 genomic island |
| 29 |      |     |                                                                    |                        |
| 30 |      |     |                                                                    |                        |
| 31 | 2264 | 260 | F GCTACCGCGGAGATGGGGGATTAT<br>R CACGCGTTGCGGGTAGGTTTCA             | APEC O1 genomic island |
| 32 |      |     |                                                                    |                        |
| 33 |      |     |                                                                    |                        |
| 34 | 2103 | 404 | F CCTGGGGCAGTGCGAGCAACTTG<br>R CGGCGCACATAAATACCCTGGCTACAC         | APEC O1 genomic island |
| 35 |      |     |                                                                    |                        |
| 36 |      |     |                                                                    |                        |
| 37 | 2101 | 445 | F ATATGGGCGAATCGGAAGTGGCAGTT<br>R AGGCCGATGAATGCGCAAACCAAC         | APEC O1 genomic island |
| 38 |      |     |                                                                    |                        |
| 39 |      |     |                                                                    |                        |
| 40 | 2099 | 503 | F GGGAGCGCGTGCGGATGGTT<br>R ATTGCCGGCTCGTCCTTCCTTTTGA              | APEC O1 genomic island |
| 41 |      |     |                                                                    |                        |
| 42 |      |     |                                                                    |                        |
| 43 | 2095 | 338 | F GATTGCCGAATGTGCCGAGCGTAAA<br>R GTGCGCCGACGGCTAATTCTTCAATC        | APEC O1 genomic island |
| 44 |      |     |                                                                    |                        |
| 45 |      |     |                                                                    |                        |
| 46 | 2093 | 556 | F GGGGGCGGATGAAGAAAATAAAACTG<br>R TGCCCGTCCGCAAACCAACAG            | APEC O1 genomic island |
| 47 |      |     |                                                                    |                        |
| 48 |      |     |                                                                    |                        |
| 49 | 2080 | 250 | F AGGCCGATCTGGTGCGCAATTTTATTC<br>R AGCCGATCTACGCCTTTTTTCAGCAACAC   | APEC O1 genomic island |
| 50 |      |     |                                                                    |                        |
| 51 |      |     |                                                                    |                        |
| 52 | 2078 | 595 | F GGGTGCAGCGGTGAGAGGAAAATAACT<br>R GCGGGCTAAGGCGTTGTTGACCTG        | APEC O1 genomic island |
| 53 |      |     |                                                                    |                        |
| 54 |      |     |                                                                    |                        |
| 55 | 2071 | 298 | F TTGTCGCCCCGAAAATAACGCTAAACC<br>R AATGCGGCGCTGGCCATGATTACC        | APEC O1 genomic island |
| 56 |      |     |                                                                    |                        |

|    |              |     |                                                                       |                        |
|----|--------------|-----|-----------------------------------------------------------------------|------------------------|
| 1  | 2068         | 211 | F AGCCGGGAAATTATCAGCCTGGCACTT<br>R CTTCGCCTTCGAGCACTTCCTGGATGT        | APEC O1 genomic island |
| 2  |              |     |                                                                       |                        |
| 3  |              |     |                                                                       |                        |
| 4  | <i>ace37</i> | 420 | F CGCTGTCATGGTTTTGGCAAAGAAATC<br>R AATCGCGGGTGTACTTCCGGATACATC        | APEC BEN2908 EPI-I     |
| 5  |              |     |                                                                       |                        |
| 6  |              |     |                                                                       |                        |
| 7  | <i>ace41</i> | 365 | F CACCGTGGTCAATGACTTCCTGGACTG<br>R AGGTGCGCCATTTAATGTTGCGATAGGT       | APEC BEN2908 EPI-I     |
| 8  |              |     |                                                                       |                        |
| 9  |              |     |                                                                       |                        |
| 10 | <i>ace43</i> | 496 | F GAGCTGGCCCTGGGCATCTGC<br>R CGGCGGTAACTATCGGGGTAATGATTTC             | APEC BEN2908 EPI-I     |
| 11 |              |     |                                                                       |                        |
| 12 |              |     |                                                                       |                        |
| 13 | <i>ace46</i> | 299 | F TTAATCGGGCCAGGAGGCAGAAGAAGA<br>R CGGCCCGGCTTATCTGCTTTTTAGTTAT       | APEC BEN2908 EPI-I     |
| 14 |              |     |                                                                       |                        |
| 15 |              |     |                                                                       |                        |
| 16 | <i>ace58</i> | 558 | F CCGGCGGTGAAAACGTTTCGAAGAGTAT<br>R TGCTATAACCCCGGCCTTTCGTTTCTGT      | APEC BEN2908 EPI-I     |
| 17 |              |     |                                                                       |                        |
| 18 |              |     |                                                                       |                        |
| 19 | <i>ace63</i> | 459 | F ATTCTCCGCGGCACTCCTCAATGA<br>R CAACCACGCAGGGGAAACGCTTTAT             | APEC BEN2908 EPI-I     |
| 20 |              |     |                                                                       |                        |
| 21 |              |     |                                                                       |                        |
| 22 | <i>ace68</i> | 246 | F AATTGCCGGAGCGCTGGTTGAAGA<br>R ACGGGGCGTTGCCTGATGATACTGAC            | APEC BEN2908 EPI-I     |
| 23 |              |     |                                                                       |                        |
| 24 |              |     |                                                                       |                        |
| 25 | <i>ace71</i> | 209 | F ACCGGGGAAATGTGGTGGACAGAGTC<br>R CCGGCGTCGTGGCGTCAGAAT               | APEC BEN2908 EPI-I     |
| 26 |              |     |                                                                       |                        |
| 27 |              |     |                                                                       |                        |
| 28 | <i>ace35</i> | 155 | F AAGGGCACAGTAACGCAACCGAACCT<br>R GAATGGCATCCGGCCGTATGTTGTT           | APEC BEN2908 EPI-I     |
| 29 |              |     |                                                                       |                        |
| 30 |              |     |                                                                       |                        |
| 31 | 1696         | 352 | F TAGCGGCCTACGCGTGCCTGAT<br>R GGGCGATTAAGCCGGGAACCACT                 | APEC O1 genomic island |
| 32 |              |     |                                                                       |                        |
| 33 |              |     |                                                                       |                        |
| 34 | 3040         | 397 | F ATCGGGCCGACAAAATCAGTCCAC<br>R ATGGCCGACGGTTATTGCCTTAGC              | APEC O1 genomic island |
| 35 |              |     |                                                                       |                        |
| 36 |              |     |                                                                       |                        |
| 37 | 1698         | 234 | F GGTATTACGCGGGCCGCATTGTC<br>R CCTTGCTGCAACACGGGAGGAAT                | APEC O1 genomic island |
| 38 |              |     |                                                                       |                        |
| 39 |              |     |                                                                       |                        |
| 40 | 4059         | 268 | F AAATTACCGCCCCAGCCAAAGCCCCTAAAG<br>R GCCCCACTCTGCTGGCTCGTTCTGTAAA    | APEC O1 genomic island |
| 41 |              |     |                                                                       |                        |
| 42 |              |     |                                                                       |                        |
| 43 | 4055         | 377 | F GCGGTGGGCGTTCTGCGGATTCC<br>R GGCGCGGGCAGAGTATAGACGCATTGGTT          | APEC O1 genomic island |
| 44 |              |     |                                                                       |                        |
| 45 |              |     |                                                                       |                        |
| 46 | 4053         | 443 | F CCGCGAGAGTTAATAAATCTGCCGACACCA<br>R GCTGCGGCGGTAACCTTCTCTACAGGGTTTT | APEC O1 genomic island |
| 47 |              |     |                                                                       |                        |
| 48 |              |     |                                                                       |                        |
| 49 | 4051         | 408 | F TCCCTGCGTCGAAATCCCTCTGCTCTGAAC<br>R GCGGCGGCCACTATGGGGGCTACC        | APEC O1 genomic island |
| 50 |              |     |                                                                       |                        |
| 51 |              |     |                                                                       |                        |
| 52 | 4041         | 512 | F CCGCCATCCCATCGCCATCATTTGT<br>R GCGGCAGACCATCAACAGCGCCTACTTC         | APEC O1 genomic island |
| 53 |              |     |                                                                       |                        |
| 54 |              |     |                                                                       |                        |
| 55 | 4038         | 322 | F TAGTCCGGCGAATGCCTCAGTGTTGTGCTC<br>R TCCAGAGACGCGCTATCAGCCGCTTATGCT  | APEC O1 genomic island |
| 56 |              |     |                                                                       |                        |

|    |      |     |                                                                     |                        |
|----|------|-----|---------------------------------------------------------------------|------------------------|
| 1  | 4030 | 214 | F CTGTGTCCGGAGGCGTACTCATGGGTTCTG<br>R AGATTCCCGTGGCGGCATCCGGTTATGTA | APEC O1 genomic island |
| 2  |      |     |                                                                     |                        |
| 3  |      |     |                                                                     |                        |
| 4  | 4022 | 584 | F AGGATCGCGGTTTCGCAGGGACCAATGTA<br>R GGCGGGCGAACAGTTCAATGCGAGAAAC   | APEC O1 genomic island |
| 5  |      |     |                                                                     |                        |
| 6  |      |     |                                                                     |                        |
| 7  | 1684 | 379 | F CATTTCGCGGTGGTATGTTTCTGTTT<br>R GATATCAGCGGTAAAGCGAGCGGTGACT      | APEC O1 genomic island |
| 8  |      |     |                                                                     |                        |
| 9  |      |     |                                                                     |                        |
| 10 | 1683 | 422 | F CCGGGAAGCGTTCTGACATGACGATTGT<br>R ACCAGCGCAGTTCGCAGCTCTATCAACC    | APEC O1 genomic island |
| 11 |      |     |                                                                     |                        |
| 12 |      |     |                                                                     |                        |
| 13 | 1682 | 340 | F CACCGCATCCCGTATAGAGCAGCCTGAA<br>R TGCCTGACCGGTGACTCCGACTGGTT      | APEC O1 genomic island |
| 14 |      |     |                                                                     |                        |
| 15 |      |     |                                                                     |                        |
| 16 | 1681 | 227 | F CACCCCTTTAAAACGAGCAGCATTACTG<br>R AACGCCGCCCTATCAGCAGACAACATTT    | APEC O1 genomic island |
| 17 |      |     |                                                                     |                        |
| 18 |      |     |                                                                     |                        |
| 19 | 1665 | 489 | F AATCCCCCGGTGAGCCAAGTGCTAACTG<br>R CGACGGCCGCGAGTGCGTAACC          | APEC O1 genomic island |
| 20 |      |     |                                                                     |                        |
| 21 |      |     |                                                                     |                        |
| 22 | 1664 | 273 | F GCGGGATCTGCGTGGTCTTCGTCAGT<br>R CGCCCGCTTCCACCCGCAAGTTA           | APEC O1 genomic island |
| 23 |      |     |                                                                     |                        |
| 24 |      |     |                                                                     |                        |
| 25 | 1663 | 158 | F GCGGGCGGCATCGGCATTTTACT<br>R CACGGCGGAAAGTCGTACAGCCACAC           | APEC O1 genomic island |
| 26 |      |     |                                                                     |                        |
| 27 |      |     |                                                                     |                        |
| 28 | 1662 | 527 | F GTGATGGCGTGGGTGGCGACTCAGTATC<br>R GCCGCGAGGATTGACACCAGCAAGTAAG    | APEC O1 genomic island |
| 29 |      |     |                                                                     |                        |
| 30 |      |     |                                                                     |                        |
| 31 |      |     |                                                                     |                        |
| 32 |      |     |                                                                     |                        |

---

§ = *papG* genotypes were assessed using an allele-specific assay developed by Johnson and Brown (2).

33  
34  
35  
36  
37

1 **REFERENCES**

- 2 1. **Janben, T., C. Schwarz, P. Preikschat, M. Voss, H. C. Philipp, and L. H. Wieler.**  
3 2001. Virulence-associated genes in avian pathogenic *Escherichia coli* (APEC) isolated  
4 from internal organs of poultry having died from colibacillosis. *Int.J.Med.Microbiol.*  
5 **291:371-378.**
- 6 2. **Johnson, J. R., and J. J. Brown.** 1996. A novel multiply primed polymerase chain  
7 reaction assay for identification of variant papG genes encoding the Gal(alpha 1-4)Gal-  
8 binding PapG adhesins of *Escherichia coli*. *J Infect Dis* **173:920-926.**
- 9 3. **Johnson, J. R., and A. L. Stell.** 2000. Extended virulence genotypes of *Escherichia coli*  
10 strains from patients with urosepsis in relation to phylogeny and host compromise. *J.*  
11 *Infect. Dis.* **181:261-272.**
- 12 4. **Johnson, T. J., S. Kariyawasam, Y. Wannemuehler, P. Mangiamele, S. J. Johnson,**  
13 **C. Doetkott, J. A. Skyberg, A. M. Lynne, J. R. Johnson, and L. K. Nolan.** 2007. The  
14 genome sequence of avian pathogenic *Escherichia coli* strain O1:K1:H7 shares strong  
15 similarities with human extraintestinal pathogenic *E. coli* genomes. *J. Bacteriol.*  
16 **189:3228-3236.**
- 17 5. **Johnson, T. J., Y. M. Wannemuehler, S. J. Johnson, C. M. Logue, D. G. White, C.**  
18 **Doetkott, and L. K. Nolan.** 2007. Plasmid replicon typing of commensal and pathogenic  
19 *Escherichia coli* isolates. *Appl. Environ. Microbiol.* **73:1976-1983.**
- 20 6. **Johnson, T. J., Y. M. Wannemuehler, and L. K. Nolan.** 2008. Evolution of the *iss*  
21 gene in *Escherichia coli*. *Appl. Environ. Microbiol.* **74:2360-2369.**

- 1 7. **Maurer, J. J., T. P. Brown, W. L. Steffens, and S. G. Thayer.** 1998. The occurrence of  
2 ambient temperature-regulated adhesins, curli, and the temperature-sensitive  
3 hemagglutinin *tsh* among avian *Escherichia coli*. Avian Dis. **42**:106-118.
- 4 8. **Rodriguez-Siek, K. E., C. W. Giddings, C. Doetkott, T. J. Johnson, M. K. Fakhr,**  
5 **and L. K. Nolan.** 2005. Comparison of *Escherichia coli* isolates implicated in human  
6 urinary tract infection and avian colibacillosis. Microbiology **151**:2097-2110.
- 7 9. **Runyen-Janecky, L. J., S. A. Reeves, E. G. Gonzales, and S. M. Payne.** 2003.  
8 Contribution of the *Shigella flexneri* Sit, Iuc, and Feo iron acquisition systems to iron  
9 acquisition *in vitro* and in cultured cells. Infect. Immun. **71**:1919-1928.
- 10  
11
