# Supplementary material
Source: PubMed Central journal article supplement (PMC3406136)
Supplement: AEM.07869-11_zam999103556so2.pdf [file AEM.07869-11_zam999103556so2.pdf]

**Supplementary Table 2. Comparative prevalence of plasmid and chromosomally mediated genes and traits and plasmid replicon types in human NMEC and HFEC§**

| <b>Gene</b>                               | <b>NMEC</b><br>n = 85<br>(%) | <b>HFEC</b><br>n = 204<br>(%) | <b>Chi square</b> | <b>p-value</b> |
|-------------------------------------------|------------------------------|-------------------------------|-------------------|----------------|
| <b>Plasmid-PAI Genes/Traits</b>           |                              |                               |                   |                |
| <i>sitA</i>                               | 96.5                         | 62.3                          | 35.09             | <0.0001        |
| <i>traT</i>                               | 88.2                         | 54.4                          | 29.93             | <0.0001        |
| <i>iutA</i>                               | 80                           | 29.9                          | 69.04             | <0.0001        |
| <i>cvaA</i>                               | 71.8                         | 14.2                          | 92.67             | <0.0001        |
| <i>cvaB5</i>                              | 68.2                         | 13.2                          | 87.42             | <0.0001        |
| <i>ompTp</i>                              | 67.1                         | 3.9                           | 137.20            | <0.0001        |
| <i>iroN</i>                               | 65.9                         | 22.6                          | 49.33             | <0.0001        |
| <i>cvaB3'</i>                             | 64.7                         | 17.2                          | 63.26             | <0.0001        |
| <i>etsA</i>                               | 63.5                         | 6.9                           | 107.08            | <0.0001        |
| <i>hlyF</i>                               | 62.4                         | 3.9                           | 123.02            | <0.0001        |
| <i>etsB</i>                               | 61.2                         | 8.3                           | 92.18             | <0.0001        |
| <i>cvaC</i>                               | 57.7                         | 3.9                           | 109.38            | <0.0001        |
| <i>iss</i>                                | 56.5                         | 7.4                           | 84.91             | <0.0001        |
| <i>tsh</i>                                | 32.9                         | 0.9                           | 65.88             | <0.0001        |
| <i>colB</i>                               | 21.2                         | 3.9                           | 21.82             | <0.0001        |
| <i>eitA</i>                               | 5.9                          | 3.9                           | 0.54              | 0.4637         |
| <i>eitB</i>                               | 5.9                          | 3.9                           | 0.54              | 0.4637         |
| <i>colM</i>                               | 2.4                          | 3.4                           | 0.23              | 0.6306         |
| <b>Chromosomally Encoded Genes/Traits</b> |                              |                               |                   |                |
| <b>Adhesins</b>                           |                              |                               |                   |                |
| <i>bmaE</i>                               | 2.35                         | 0                             | 4.8334            | 0.0279         |
| <i>fimH</i>                               | 95.3                         | 92.2                          | 0.92              | 0.3383         |
| <i>focG</i>                               | 2.4                          | 3.4                           | 0.23              | 0.6306         |
| <i>gafD</i>                               | 1.2                          | 0.5                           | 0.41              | 0.5214         |
| <i>papA</i>                               | 30.6                         | 28.4                          | 0.14              | 0.7129         |
| <i>papC</i>                               | 36.5                         | 31.9                          | 0.57              | 0.4486         |
| <i>papEF</i>                              | 32.9                         | 30.9                          | 0.12              | 0.7313         |
| <i>papGI</i>                              | 56.5                         | 13.7                          | 56.56             | <0.0001        |
| <i>papGI'</i>                             | 31.8                         | 13.2                          | 13.56             | 0.0002         |
| <i>papGII</i>                             | 24.7                         | 18.6                          | 1.36              | 0.2428         |
| <i>papGIII</i>                            | 4.7                          | 13.2                          | 5.56              | 0.0328         |
| <i>papG1*</i>                             | 5.9                          | 2.5                           | 2.11              | 0.1459         |
| <i>papG 2/ 3</i>                          | 16.5                         | 23.5                          | 1.77              | 0.1829         |
| <i>sfaS</i>                               | 49.4                         | 6.9                           | 69.53             | <0.0001        |
| <i>sfa-foc</i>                            | 55.3                         | 16.2                          | 45.86             | <0.0001        |
| <i>adhE</i>                               | 0                            | 3.92                          | 3.4282            | 0.0641         |
| <i>eaeH</i>                               | 97.7                         | 88.2                          | 6.51              | 0.0105         |
| <i>aufA</i>                               | 75.3                         | 48                            | 18.09             | <0.0001        |
| <i>aufC</i>                               | 77.7                         | 49.5                          | 19.47             | <0.0001        |
| <i>aufE</i>                               | 77.7                         | 49                            | 20.11             | <0.0001        |
| <i>aufG</i>                               | 67.1                         | 64.2                          | 0.21              | 0.6447         |
| <b>Iron-Related Genes/Traits</b>          |                              |                               |                   |                |
| <i>feoB</i>                               | 100                          | 96.1                          | 3.43              | 0.0641         |
| <i>fyuA</i>                               | 69.4                         | 58.3                          | 3.11              | 0.0777         |
| <i>fyuA1</i>                              | 95.3                         | 63.2                          | 31.05             | <0.0001        |

|                                   |      |      |        |         |
|-----------------------------------|------|------|--------|---------|
| <i>ireA</i>                       | 17.6 | 19.1 | 0.09   | 0.7701  |
| <i>irp2</i>                       | 94.1 | 62.3 | 29.97  | <0.0001 |
| <b>Protectins</b>                 |      |      |        |         |
| <i>kpsMT K1</i>                   | 71.8 | 26.9 | 50.13  | <0.0001 |
| <i>kpsMTII</i>                    | 87.1 | 58.8 | 21.68  | <0.0001 |
| <i>kpsMTIII</i>                   | 1.2  | 0.9  | 0.02   | 0.8809  |
| <b>Toxin Genes</b>                |      |      |        |         |
| <i>cdtB</i>                       | 37.7 | 2.5  | 66.58  | <0.0001 |
| <i>cnf1</i>                       | 4.7  | 14.7 | 5.78   | 0.0162  |
| <i>hlyD</i>                       | 3.4  | 13.2 | 6.08   | 0.0137  |
| <b>Miscellaneous Genes/Traits</b> |      |      |        |         |
| <i>fliCH7</i>                     | 50.6 | 21.1 | 24.99  | <0.0001 |
| <i>ibeA</i>                       | 60   | 16.7 | 54.27  | <0.0001 |
| <i>ompT</i>                       | 30.6 | 56.9 | 16.57  | <0.0001 |
| <i>maIX PAI</i>                   | 57.6 | 50   | 1.41   | 0.2357  |
| <i>gimB</i>                       | 60   | 22.6 | 37.74  | <0.0001 |
| <i>VC39</i>                       | 0    | 0.49 | 0.4181 | 0.5179  |
| <i>vat</i>                        | 77.6 | 51.9 | 16.43  | <0.0001 |
| <i>I024UI</i>                     | 5.9  | 2.9  | 1.42   | 0.2338  |
| <i>I051UI</i>                     | 2.4  | 1.5  | 0.27   | 0.6002  |
| <i>parB</i>                       | 5.9  | 3.9  | 0.54   | 0.4637  |
| <i>umuC</i>                       | 5.9  | 3.9  | 0.54   | 0.4637  |
| <i>rfc</i>                        | 4.7  | 1.9  | 1.68   | 0.1949  |
| <i>iha</i>                        | 28.2 | 20.6 | 1.99   | 0.1582  |
| <i>afa</i>                        | 27.1 | 4.9  | 29.12  | <0.0001 |
| <i>blaTEM</i>                     | 34.1 | 17.7 | 9.34   | 0.0022  |
| <i>aac3 VIa</i>                   | 0    | 0.49 | 0.4181 | 0.5179  |
| <i>aac3 VIb</i>                   | 0    | 0.98 | 0.8391 | 0.3596  |
| <i>tetA</i>                       | 21.2 | 4.4  | 19.91  | <0.0001 |
| <i>tetB</i>                       | 1.2  | 7.4  | 4.38   | 0.0364  |
| <i>groEL</i>                      | 0    | 0.98 | 0.8391 | 0.3596  |
| <i>aph3IA</i>                     | 1.2  | 2.5  | 0.48   | 0.4887  |
| <i>terX</i>                       | 3.53 | 0    | 7.2755 | 0.0070  |
| <i>pcoA</i>                       | 2.4  | 9.3  | 4.31   | 0.0378  |
| <i>pcoD</i>                       | 2.4  | 7.8  | 3.10   | 0.0785  |
| <i>pcoE</i>                       | 20   | 25.9 | 1.17   | 0.2796  |
| <i>dfr1</i>                       | 5.9  | 1.5  | 4.34   | 0.0373  |
| <i>dfr7</i>                       | 0    | 2.45 | 2.12   | 0.1454  |
| <i>dfr17</i>                      | 2.4  | 32.4 | 30.01  | <0.0001 |
| <i>arsC</i>                       | 84.7 | 57.4 | 19.84  | <0.0001 |
| <i>silE</i>                       | 3.5  | 9.3  | 2.85   | 0.0911  |
| <i>silP</i>                       | 2.4  | 8.3  | 3.49   | 0.0616  |
| <i>sulI</i>                       | 11.8 | 4.9  | 4.39   | 0.0362  |
| <i>merA</i>                       | 11.8 | 5.9  | 2.95   | 0.0858  |
| <i>intI1</i>                      | 14.1 | 5.4  | 6.24   | 0.0125  |
| <i>iseC12</i>                     | 34.1 | 29.4 | 0.62   | 0.4298  |
| <i>aadA</i>                       | 7.1  | 0.9  | 8.24   | 0.0041  |
| <i>qacEdelta1</i>                 | 12.9 | 4.4  | 6.78   | 0.0092  |
| <b>Plasmid Replicons</b>          |      |      |        |         |
| B/O                               | 41.2 | 14.7 | 24.12  | <0.0001 |
| FIC                               | 3.5  | 2.9  | 0.07   | 0.7931  |
| A/C                               | 0    | 0.49 | 0.4181 | 0.5179  |
| P                                 | 9.4  | 1.5  | 10.33  | 0.0013  |

|      |      |      |        |         |
|------|------|------|--------|---------|
| K/B  | 2.4  | 0.9  | 0.83   | 0.3628  |
| FIIA | 1.2  | 0.9  | 0.02   | 0.8809  |
| FIA  | 1.2  | 3.4  | 1.13   | 0.2870  |
| FIB  | 92.9 | 55.4 | 37.94  | <0.0001 |
| Y    | 1.2  | 3.4  | 1.13   | 0.2870  |
| II   | 7.1  | 7.8  | 0.05   | 0.8188  |
| III1 | 0    | 1.96 | 1.6901 | 0.1936  |
| N    | 1.18 | 0    | 2.4083 | 0.1207  |
| L/M  | 0    | 0.49 | 0.4181 | 0.5179  |

**APEC O1 Genomic Islands Genes/Traits of Unknown Function**

|      |      |      |       |         |
|------|------|------|-------|---------|
| 1712 | 81.2 | 51.5 | 22.10 | <0.0001 |
| 1717 | 9.4  | 2.5  | 6.77  | 0.0093  |
| 1718 | 1.2  | 0.5  | 0.41  | 0.5214  |
| 1716 | 5.9  | 0.9  | 6.10  | 0.0135  |
| 1721 | 5.9  | 2.5  | 2.11  | 0.1459  |
| 1713 | 76.5 | 50.9 | 16.06 | <0.0001 |
| 1724 | 5.9  | 2.5  | 2.11  | 0.1459  |
| 1753 | 71.8 | 31.4 | 39.88 | <0.0001 |
| 1756 | 69.4 | 38.2 | 23.39 | <0.0001 |
| 1757 | 75.3 | 38.2 | 32.97 | <0.0001 |
| 1761 | 75.3 | 35.3 | 38.53 | <0.0001 |
| 1767 | 70.6 | 38.2 | 25.17 | <0.0001 |
| 1770 | 70.6 | 38.2 | 25.17 | <0.0001 |
| 1771 | 75.3 | 35.3 | 38.53 | <0.0001 |
| 4460 | 14.1 | 4.4  | 8.39  | 0.0038  |
| 4464 | 42.4 | 20.6 | 14.42 | 0.0001  |
| 4467 | 48.2 | 25   | 14.93 | 0.0001  |
| 4468 | 49.4 | 25.9 | 14.93 | 0.0001  |
| 4472 | 49.9 | 25.9 | 14.93 | 0.0001  |
| 4480 | 41.2 | 23.5 | 9.13  | 0.0025  |
| 11   | 47.1 | 19.6 | 22.58 | <0.0001 |
| 12   | 49.4 | 25.9 | 14.93 | 0.0001  |
| 516  | 10.6 | 12.3 | 0.16  | 0.6886  |
| 517  | 10.6 | 11.3 | 0.03  | 0.8655  |
| 520  | 9.4  | 9.3  | 0.01  | 0.9792  |
| 522  | 9.4  | 8.8  | 0.03  | 0.8735  |
| 525  | 10.6 | 9.3  | 0.11  | 0.7386  |
| 530  | 10.6 | 8.3  | 0.37  | 0.5416  |
| 532  | 9.4  | 8.3  | 0.09  | 0.7663  |
| 1177 | 54.1 | 27.5 | 18.68 | <0.0001 |
| 1179 | 49.4 | 23.5 | 18.74 | <0.0001 |
| 17-3 | 12.9 | 9.8  | 0.62  | 0.4323  |
| 17-4 | 7.1  | 11.3 | 1.18  | 0.2771  |
| 1180 | 52.9 | 26.9 | 17.90 | <0.0001 |
| 1181 | 48.2 | 23   | 17.99 | <0.0001 |
| 1184 | 54.1 | 27.5 | 18.68 | <0.0001 |
| 1185 | 37.7 | 26.5 | 3.59  | 0.0583  |
| 2314 | 64.7 | 62.3 | 0.15  | 0.6942  |
| 18-2 | 36.5 | 32.8 | 0.35  | 0.5528  |
| 2310 | 34.1 | 30.4 | 0.39  | 0.5344  |

|              |      |      |        |         |
|--------------|------|------|--------|---------|
| 2301         | 34.1 | 32   | 0.12   | 0.7291  |
| 2291         | 15.3 | 19.1 | 0.59   | 0.4407  |
| 2277         | 14.1 | 19.6 | 1.23   | 0.2683  |
| 2291         | 15.3 | 18.6 | 0.46   | 0.4982  |
| 2271         | 12.9 | 18.6 | 1.38   | 0.2405  |
| 2264         | 15.3 | 17.2 | 0.15   | 0.6982  |
| 2103         | 64.7 | 16.7 | 64.97  | <0.0001 |
| 2101         | 64.7 | 16.2 | 66.72  | <0.0001 |
| 2099         | 43.5 | 8.8  | 46.90  | <0.0001 |
| 2095         | 64.7 | 16.7 | 64.97  | <0.0001 |
| 2093         | 64.7 | 16.2 | 66.72  | <0.0001 |
| 2080         | 50.6 | 26.9 | 14.95  | 0.0001  |
| 2078         | 38.8 | 3.4  | 63.02  | <0.0001 |
| 2071         | 74.1 | 38.2 | 30.92  | <0.0001 |
| 2068         | 72.9 | 37.6 | 29.77  | <0.0001 |
| <i>aec37</i> | 1.2  | 1.9  | 0.22   | 0.6413  |
| <i>aec41</i> | 1.2  | 0.5  | 0.41   | 0.5214  |
| <i>aec43</i> | 12.9 | 0.9  | 19.98  | <0.0001 |
| <i>aec46</i> | 1.2  | 0.5  | 0.41   | 0.5214  |
| <i>aec58</i> | 58.8 | 59.8 | 0.02   | 0.8771  |
| <i>aec63</i> | 7.1  | 34.8 | 23.63  | <0.0001 |
| <i>aec68</i> | 8.2  | 40.7 | 29.47  | <0.0001 |
| <i>aec71</i> | 30.6 | 67.2 | 32.63  | <0.0001 |
| <i>aec35</i> | 75.3 | 1.9  | 179.33 | <0.0001 |
| 1696         | 88.2 | 67.2 | 13.64  | 0.0002  |
| 3040         | 85.9 | 80.9 | 1.03   | 0.3097  |
| 1698         | 88.2 | 66.7 | 14.16  | 0.0002  |
| 4059         | 30.6 | 5.9  | 32.07  | <0.0001 |
| 4055         | 2.4  | 4.9  | 0.98   | 0.3223  |
| 4053         | 3.5  | 8.8  | 2.50   | 0.1142  |
| 4051         | 4.7  | 2.9  | 0.56   | 0.4545  |
| 4038         | 32.9 | 12.3 | 17.14  | <0.0001 |
| 4030         | 32.9 | 13.2 | 15.12  | 0.0001  |
| 4022         | 28.2 | 13.2 | 9.29   | 0.0023  |
| 1648         | 83.5 | 64.2 | 10.64  | 0.0011  |
| 1683         | 82.4 | 57.4 | 16.42  | <0.0001 |
| 1682         | 83.5 | 64.2 | 10.64  | 0.0011  |
| 1681         | 83.5 | 64.2 | 10.64  | 0.0011  |
| 1665         | 81.2 | 44.1 | 33.30  | <0.0001 |
| 1664         | 81.2 | 45.1 | 31.65  | <0.0001 |
| 1663         | 81.2 | 45.1 | 31.65  | <0.0001 |
| 1662         | 76.5 | 41.7 | 29.11  | <0.0001 |

---

§ = Some of the genes/traits listed above could be assigned to multiple categories, e.g., *iroN* and *iutA* are involved in iron acquisition (1), and *iss* encodes a protectin (1). However, all three are categorized as plasmid genes rather than into the more ‘function-oriented’ groups in an effort to better detect plasmid PAIs in the isolates studied here. In addition, some genes may occur in plasmid and chromosomal PAIs, sometimes in the same isolate. For example, *sitA* has been found on the chromosome and on a plasmid PAI in APEC O1.

The following traits were not detected in NMEC or HFEC: *terD*, *terF*, *terY3*, *qnr*, IncT, IncW, IncX, IncHIII, and APEC O1 genomic island 4041.

1. **Rodriguez-Siek, K. E., C. W. Giddings, C. Doetkott, T. J. Johnson, M. K. Fakhr, and L. K. Nolan.** 2005. Comparison of *Escherichia coli* isolates implicated in human urinary tract infection and avian colibacillosis. *Microbiology* **151**:2097-2110.
